# Supplementary material for: Association of COVID-19 With Major Arterial and Venous Thrombotic Diseases: A Population-Wide Cohort Study of 48 Million Adults in England and Wales
Source: PubMed Central journal article supplement (PMC9484653; doi:10.1161/circulationaha.122.060785), 2022-09-20

## SUPPLEMENTAL MATERIAL

Tables S1-S6

Figures S1-S5

### Supplementary Table 1. Derivation of COVID-19 variables in the English NHS Digital TRE and Welsh SAIL Databank TRE environments.

All codelists are available in the GitHub for England: [https://github.com/BHFDSC/CCU002\\_01/tree/main/england/phenotypes](https://github.com/BHFDSC/CCU002_01/tree/main/england/phenotypes)

and similarly for Wales where Read codes were used for primary care: [https://github.com/BHFDSC/CCU002\\_01/tree/main/Wales/phenotypes](https://github.com/BHFDSC/CCU002_01/tree/main/Wales/phenotypes)

| Variable                    | Data Sources (NHS England)                                | Data Sources (SAIL Databank)    | Description                                                                                                                                                                                                                                                                                                                                                                               | Variable name in analysis code |
|-----------------------------|-----------------------------------------------------------|---------------------------------|-------------------------------------------------------------------------------------------------------------------------------------------------------------------------------------------------------------------------------------------------------------------------------------------------------------------------------------------------------------------------------------------|--------------------------------|
| <b>Exposure</b>             |                                                           |                                 |                                                                                                                                                                                                                                                                                                                                                                                           |                                |
| COVID-19 diagnosis date     | SGSS, GDPPR, deaths registry, HES APC, HES CC, CHESS, SUS | PATD (Pillar 1 & 2), PEDW, WLGP | Minimum date of confirmed COVID-19 event post index date. A record of a positive COVID-19 PCR antigen test or a record of confirmed diagnosis in primary care general practice or secondary care hospital admission records.                                                                                                                                                              | exp_confirmed_covid19_date     |
| COVID-19 infection severity | SGSS, GDPPR, deaths registry, HES APC, HES CC, CHESS, SUS | PATD (Pillar 1 & 2), PEDW, WLGP | COVID-19 infection with hospitalisation was defined as a hospital admission record with confirmed COVID-19 diagnosis in the primary position within 28 days of first COVID-19 infection. COVID-19 infection without hospitalisation was defined as a confirmed COVID-19 diagnosis in the primary position within 28 days of first COVID-19 infection without a hospital admission record. | exp_confirmed_covid_phenotype  |

Acronyms: GDPPR (General Practice Extraction Service (GPES) Data for pandemic planning and research), HES (Hospital Episode Statistics), APC (Admitted Patient Care), , ADDE (Annual District Death Extract), PEDW (Patient Episode Dataset for Wales), WLGP (Welsh Longitudinal GP Dataset - Welsh Primary Care), PATD (COVID-19 Test Results), CHESS (COVID-19 Hospitalisation in England Surveillance System), SGSS (Covid-19 Second Generation Surveillance System).

## Supplementary Table 2. Derivation of major outcomes in the English NHS Digital TRE and Welsh SAIL Databank TRE environments.

All codelists are available in the GitHub for England [https://github.com/BHFDSC/CCU002\\_01/tree/main/england/phenotypes](https://github.com/BHFDSC/CCU002_01/tree/main/england/phenotypes) and similarly for Wales where Read codes were used for primary care: [https://github.com/BHFDSC/CCU002\\_01/tree/main/Wales/phenotypes](https://github.com/BHFDSC/CCU002_01/tree/main/Wales/phenotypes)

| Outcome                                  | Data Sources (NHS Digital)      | Data Sources (SAIL Databank) | Description                                                                                                                                         | Variable name in analysis code    |
|------------------------------------------|---------------------------------|------------------------------|-----------------------------------------------------------------------------------------------------------------------------------------------------|-----------------------------------|
| <b>Arterial thromboses</b>               |                                 |                              |                                                                                                                                                     |                                   |
| Myocardial infarction                    | GDPPR, HES APC, deaths registry | WLGP, PEDW, ADDE             | Earliest recorded date of primary care event or consultation, admission to hospital (coded as primary cause), or death (coded as underlying cause). | out_AMI                           |
| Ischaemic stroke                         | GDPPR, HES APC, deaths registry | WLGP, PEDW, ADDE             | Earliest recorded date of primary care event or consultation, admission to hospital (coded as primary cause), or death (coded as underlying cause). | out_stroke_isch                   |
| Other arterial thromboembolism           | HES APC, deaths registry        | PEDW, ADDE                   | Earliest recorded date of admission to hospital (coded as primary cause of the care episode), or death (coded as underlying cause).                 | out_other_arterial_embolism       |
| <b>Venous thromboembolic events</b>      |                                 |                              |                                                                                                                                                     |                                   |
| Pulmonary embolism                       | HES APC, deaths registry        | PEDW, ADDE                   | Earliest recorded date of admission to hospital (coded as primary cause of the care episode), or death (coded as underlying cause).                 | out_PE                            |
| Lower limb deep vein thrombosis          | HES APC, deaths registry        | PEDW, ADDE                   | Earliest recorded date of admission to hospital (coded as primary cause of the care episode), or death (coded as underlying cause).                 | out_DVT_DVT,<br>out_DVT_pregnancy |
| Other deep vein thrombosis               | HES APC, deaths registry        | PEDW, ADDE                   | Earliest recorded date of admission to hospital (coded as primary cause of the care episode), or death (coded as underlying cause).                 | out_other_DVT                     |
| Portal vein thrombosis                   | HES APC, deaths registry        | PEDW, ADDE                   | Earliest recorded date of admission to hospital (coded as primary cause of the care episode), or death (coded as underlying cause).                 | out_portal_vein_thrombosis        |
| Intracranial venous thrombosis           | HES APC, deaths registry        | PEDW, ADDE                   | Earliest recorded date of admission to hospital (coded as primary cause of the care episode), or death (coded as underlying cause).                 | out_ICVT,<br>out_ICVT_pregnancy   |
| <b>Other vascular events</b>             |                                 |                              |                                                                                                                                                     |                                   |
| Intracranial or subarachnoid haemorrhage | HES APC, deaths registry        | PEDW, ADDE                   | Earliest recorded date of admission to hospital (coded as primary cause of the care episode), or death (coded as underlying cause).                 | out_stroke_SAH_HS                 |
| Heart failure                            | GDPPR, HES APC, deaths registry | WLGP, PEDW, ADDE             | Earliest recorded date of primary care event or consultation, admission to hospital (coded as primary cause), or death (coded as underlying cause). | out_HF                            |
| Angina                                   | GDPPR, HES APC, deaths registry | WLGP, PEDW, ADDE             | Earliest recorded date of primary care event or consultation, admission to hospital (coded as primary cause), or death (coded as underlying cause). | out_angina                        |
| Transient ischemic attack                | GDPPR, HES APC, deaths registry | WLGP, PEDW, ADDE             | Earliest recorded date of primary care event or consultation, admission to hospital (coded as primary cause), or death (coded as underlying cause). | out_stroke_TIA                    |

Acronyms: GDPPR (General Practice Extraction Service (GPES) Data for pandemic planning and research), HES (Hospital Episode Statistics), APC (Admitted Patient Care), ADDE (Annual District Death Extract), PEDW (Patient Episode Dataset for Wales), WLGP (Welsh Longitudinal GP Dataset - Welsh Primary Care), PATD (COVID-19 Test Results), CHESS (COVID-19 Hospitalisation in England Surveillance System), SGSS (Covid-19 Second Generation Surveillance System).

### Supplementary Table 3: Codelist for derivation of major outcomes and COVID-19 variables in the English NHS Digital TRE

All codelists are available in the GitHub for England [https://github.com/BHFDSC/CCU002\\_01/tree/main/england/phenotypes](https://github.com/BHFDSC/CCU002_01/tree/main/england/phenotypes) and similarly for Wales where Read codes were used for primary care: [https://github.com/BHFDSC/CCU002\\_01/tree/main/Wales/phenotypes](https://github.com/BHFDSC/CCU002_01/tree/main/Wales/phenotypes)

| Outcome name                           | Codelist                                                                                                                                                                                                                                                                                                                                                                                                                                                                                                                                                                                                                                                                                                                                                                                                                                                                                                                            | Code type |
|----------------------------------------|-------------------------------------------------------------------------------------------------------------------------------------------------------------------------------------------------------------------------------------------------------------------------------------------------------------------------------------------------------------------------------------------------------------------------------------------------------------------------------------------------------------------------------------------------------------------------------------------------------------------------------------------------------------------------------------------------------------------------------------------------------------------------------------------------------------------------------------------------------------------------------------------------------------------------------------|-----------|
| <b>Arterial thromboses</b>             |                                                                                                                                                                                                                                                                                                                                                                                                                                                                                                                                                                                                                                                                                                                                                                                                                                                                                                                                     |           |
| <b>Acute myocardial infarction</b>     | I21, I22, I23                                                                                                                                                                                                                                                                                                                                                                                                                                                                                                                                                                                                                                                                                                                                                                                                                                                                                                                       | ICD10     |
| <b>Acute myocardial infarction</b>     | 1755008, 10273003, 15990001, 22298006, 42531007, 52035003, 54329005, 57054005, 58612006, 62695002, 65547006, 66189004, 70211005, 70422006, 73795002, 76593002, 79009004, 129574000, 161502000, 161503005, 194802003, 194809007, 194856005, 194857001, 194858006, 194862000, 194863005, 194865003, 194866002, 194867006, 194868001, 233838001, 233843008, 233846000, 233847009, 304914007, 307140009, 308065005, 311792005, 311793000, 311796008, 314116003, 315287002, 371068009, 398274000, 399211009, 401303003, 401314000, 428752002, 698593009, 15712881000119105, 15712921000119103, 233825009, 233826005, 233832000, 285991000119100, 394659003, 394710008, 428196007, 703213009, 1089471000000109, 12238151000119107, 233827001, 233828006, 233829003, 233830008, 233831007, 233833005, 233834004, 233835003, 314207007, 703164000, 703209002, 703211006, 703360004                                                          | SNOMED    |
| <b>Ischaemic stroke</b>                | G95.1, I63.1, I63.8, I63.3, I64, I63.4, I63.2, I63.9, I63.5, I63.0, H34                                                                                                                                                                                                                                                                                                                                                                                                                                                                                                                                                                                                                                                                                                                                                                                                                                                             | ICD10     |
| <b>Ischaemic stroke</b>                | 71444005, 75543006, 78569004, 95457000, 95460007, 195185009, 195186005, 195189003, 195190007, 195200006, 195201005, 195209007, 195210002, 195211003, 230691006, 230692004, 230698000, 230699008, 230700009, 307766002, 307767006, 373606000, 413102000, 432504007, 724424009, 125081000119106, 140921000119102, 1089421000000105, 16000511000119103, 16002031000119102, 16002111000119106, 195230003, 20059004, 230693009, 230696001, 230701008, 307363008, 329641000119104, 371041009, 734383005, 87555007, 1089411000000104, 195213000, 230694003, 230695002, 230702001, 230703006, 230704000, 24654003, 25133001, 276219001, 276220007, 276221006, 276222004, 413758000, 426107000, 734384004, 90099008, 195212005, 195213000, 195216008, 195217004, 230690007, 275434003, 16371781000119100, 195209007, 195210002, 195211003, 230706003, 230708002, 281240008, 297138001, 444172003, 230707007, 230713003, 230714009, 230715005 | SNOMED    |
| <b>Other arterial embolism</b>         | I74                                                                                                                                                                                                                                                                                                                                                                                                                                                                                                                                                                                                                                                                                                                                                                                                                                                                                                                                 | ICD10     |
| <b>Venous thromboembolic events</b>    |                                                                                                                                                                                                                                                                                                                                                                                                                                                                                                                                                                                                                                                                                                                                                                                                                                                                                                                                     |           |
| <b>Pulmonary embolism</b>              | I26.9, I26.0                                                                                                                                                                                                                                                                                                                                                                                                                                                                                                                                                                                                                                                                                                                                                                                                                                                                                                                        | ICD10     |
| <b>Lower limb deep vein thrombosis</b> | I80, O87.1, O87.9, O88.2, O22.3                                                                                                                                                                                                                                                                                                                                                                                                                                                                                                                                                                                                                                                                                                                                                                                                                                                                                                     | ICD10     |
| <b>Other deep vein thrombosis</b>      | I82.3, I82.2, I82.9, I82.0, I82.8                                                                                                                                                                                                                                                                                                                                                                                                                                                                                                                                                                                                                                                                                                                                                                                                                                                                                                   | ICD10     |

|                                                         |                                                                                                                                                                                                                                                                                                                                                                                                                                                                                                                                                                                                                                                                                                                                                                                 |        |
|---------------------------------------------------------|---------------------------------------------------------------------------------------------------------------------------------------------------------------------------------------------------------------------------------------------------------------------------------------------------------------------------------------------------------------------------------------------------------------------------------------------------------------------------------------------------------------------------------------------------------------------------------------------------------------------------------------------------------------------------------------------------------------------------------------------------------------------------------|--------|
| <b>Portal vein thrombosis</b>                           | I81                                                                                                                                                                                                                                                                                                                                                                                                                                                                                                                                                                                                                                                                                                                                                                             | ICD10  |
| <b>Intracranial venous thrombosis</b>                   | I67.6, G08, I63.6, O87.3, O22.5                                                                                                                                                                                                                                                                                                                                                                                                                                                                                                                                                                                                                                                                                                                                                 | ICD10  |
| <b>Other vascular events</b>                            |                                                                                                                                                                                                                                                                                                                                                                                                                                                                                                                                                                                                                                                                                                                                                                                 |        |
| <b>Heart failure</b>                                    | I13.2, I13.0, I11.0, I50                                                                                                                                                                                                                                                                                                                                                                                                                                                                                                                                                                                                                                                                                                                                                        | ICD10  |
| <b>Heart failure</b>                                    | 717491000000102, 420300004, 430396006, 703272007, 446221000, 233924009, 10335000, 194767001, 83105008, 426611007, 275514001, 134440006, 314206003, 92506005, 43736008, 10633002, 88805009, 87837008, 195114002, 206586007, 56675007, 85232009, 426263006, 194781004, 194779001, 421704003, 407596008, 420913000, 422293003, 698592004, 134401001, 48447003, 367363000, 42343007, 79955004, 128404006, 195112003, 760361000000100, 195111005, 71892000, 84114007                                                                                                                                                                                                                                                                                                                 | SNOMED |
| <b>Angina</b>                                           | I20                                                                                                                                                                                                                                                                                                                                                                                                                                                                                                                                                                                                                                                                                                                                                                             | ICD10  |
| <b>Angina</b>                                           | 15960581000119102, 10971000087107, 300995000, 414545008, 697976003, 413439005, 394659003, 371810009, 713405002, 315025001, 25106000, 314116003, 414795007, 225566008, 85284003, 233821000, 87343002, 89323001, 371807002, 61490001, 35928006, 429559004, 233819005, 59021001, 41334000, 19057007, 194828000, 371812001, 15960381000119109, 15960061000119102, 15960141000119102, 712866001, 791000119109, 371811008, 371809004, 703214003, 413838009, 194823009, 413844008, 233823002, 413444003, 46109009, 4557003, 371806006, 15960661000119107, 371808007, 21470009                                                                                                                                                                                                          | SNOMED |
| <b>Subarachnoid haemorrhage and haemorrhagic stroke</b> | I60, I61                                                                                                                                                                                                                                                                                                                                                                                                                                                                                                                                                                                                                                                                                                                                                                        | ICD10  |
| <b>Confirmed COVID-19</b>                               | U07.1                                                                                                                                                                                                                                                                                                                                                                                                                                                                                                                                                                                                                                                                                                                                                                           | ICD10  |
| <b>Confirmed COVID-19</b>                               | 1321211000000109, 1321341000000103, 1321801000000108, 1321811000000105, 1240511000000106, 1240571000000101, 1321241000000105, 1321551000000106, 1240581000000104, 1240401000000105, 1240391000000107, 1300681000000102, 1029481000000103, 1300631000000101, 1300671000000104, 121973000, 120814005, 1240381000000105, 1321191000000105, 1300721000000109, 1240541000000107, 1322781000000102, 1240751000000100, 1240561000000108, 1321541000000108, 1321181000000108, 1321321000000105, 1321761000000103, 1240411000000107, 1240741000000103, 1008541000000105, 186747009, 1321201000000107, 1300731000000106, 1321331000000107, 1321351000000100, 1321301000000101, 1321311000000104, 1322871000000109, 1240521000000100, 1240531000000103, 1240551000000105, 1240421000000101 | SNOMED |

#### Supplementary Table 4. Derivation of covariates in the English NHS Digital TRE and Welsh SAIL Databank TRE environments.

All codelists are available in the GitHub for England: [github.com/BHFDC/CCU002\\_01/tree/main/england/phenotypes](https://github.com/BHFDC/CCU002_01/tree/main/england/phenotypes)

and similarly for Wales where Read codes were used for primary care: [https://github.com/BHFDC/CCU002\\_01/tree/main/Wales/phenotypes](https://github.com/BHFDC/CCU002_01/tree/main/Wales/phenotypes)

| Variable                           | Data Sources (NHS England)               | Data Sources (SAIL Databank)                         | Description                                                                                                                                                   | Variable name in analysis code |
|------------------------------------|------------------------------------------|------------------------------------------------------|---------------------------------------------------------------------------------------------------------------------------------------------------------------|--------------------------------|
| <b>Demographic characteristics</b> |                                          |                                                      |                                                                                                                                                               |                                |
| Patient pseudoidentifier           | All                                      | All                                                  | Patient pseudoidentifier                                                                                                                                      | NHS_NUMBER_DEID                |
| death date                         | GDPPR, HES APC, deaths registry          | C19_Cohort20 (WSD, ADDE, ADDD, CDDS)                 | Earliest date of death recorded in specified data sources                                                                                                     | death_date                     |
| sex                                | GDPPR, HES APC, HES OP, HES AE           | C19_Cohort20 (WSD)                                   | Binary indicator for male or female (most recent record prior to index date and will initially select from primary care if possible)                          | cov_sex                        |
| age                                | GDPPR, HES APC, HES OP, HES AE           | C19_Cohort20 (WSD)                                   | Age in years calculated on index date (will initially select from primary care if possible)                                                                   | cov_age                        |
| ethnicity                          | GDPPR, HES APC, HES OP, HES AE           | CCDS, CVVD, EDDS, ICNC, MIDS, NCCH, OPRD, PEDW, WASD | Patient ethnicity (most recent record prior to index date from primary care - Black or Black British, Asian or Asian British, Other, Mixed, Missing, Unknown) | cov_ethncity                   |
| smoking status                     | GDPPR                                    | WLGP                                                 | Most recent smoking status (Smoker, Ex-smoker, Never-smoker) prior to index date                                                                              | cov_smoking_status             |
| deprivation                        | English indices of deprivation year 2019 | C19_Cohort20 (WSD, PEDW)                             | Most recent decile of deprivation prior to index date, defined using IMD                                                                                      | cov_deprivation                |
| region of residence                | English indices of deprivation year 2019 | N/A                                                  | Most recent residence prior to index date (East of England, London, Midlands, NE and Yorkshire, North West, South East, South West, Scotland, Wales)          | cov_region                     |
| <b>Medications</b>                 |                                          |                                                      |                                                                                                                                                               |                                |
| antiplatelet                       | primary care medications                 | WDDS                                                 | Binary indicator for antiplatelet medication with at least one prescription within 3 months prior to index date, defined using drug use                       | cov_antiplatelet_meds          |
| lipid lowering                     | primary care medications                 | WDDS                                                 | Binary indicator for lipid lowering medication with at least one prescription within 3 months prior to index date, defined using drug use                     | cov_lipid_meds                 |
| anticoagulation                    | primary care medications                 | WDDS                                                 | Binary indicator for anticoagulation medication with at least one prescription within 3 months prior to index date, defined using drug use                    | cov_anticoagulation_meds       |
| combined oral contraceptive pill   | primary care medications                 | WDDS                                                 | Binary indicator for COCP medication with at least one prescription within 3 months prior to index date, defined using drug use                               | cov_cocp_meds                  |
| blood pressure lowering            | primary care medications                 | WDDS                                                 | Binary indicator for bp lowering medication with at least one prescription within 3 months prior to index date, defined using drug use                        | cov_ever_icvt                  |
| hormone replacement therapy        | primary care medications                 | WDDS                                                 | Binary indicator for HRT medication with at least one prescription within 3 months prior to index date, defined using drug use                                | cov_hrt_meds                   |

| Variable                       | Data Sources<br>(NHS England)            | Data Sources<br>(SAIL Databank) | Description                                                                                                                                                          | Variable name in analysis<br>code |
|--------------------------------|------------------------------------------|---------------------------------|----------------------------------------------------------------------------------------------------------------------------------------------------------------------|-----------------------------------|
| <b>Past history of disease</b> |                                          |                                 |                                                                                                                                                                      |                                   |
| acute myocardial infection     | GDPPR, HES APC                           | WLGP, PEDW                      | Binary indicator for acute myocardial infarction prior to index date, defined using condition diagnosis code only                                                    | cov_ever_ami                      |
| embolism                       | GDPPR, HES APC                           | WLGP, PEDW                      | Binary indicator for pulmonary embolism or DVT prior to index date, defined using condition diagnosis code only                                                      | cov_ever_pe_vt                    |
| intracranial venous thrombosis | GDPPR, HES APC                           | WLGP, PEDW                      | Binary indicator for ICVT prior to index date, defined using condition diagnosis code only                                                                           | cov_ever_icvt                     |
| any stroke                     | GDPPR, HES APC                           | WLGP, PEDW                      | Binary indicator for stroke (ischaemic stroke, intracranial haemorrhage, or stroke of unknown type) prior to index date, defined using condition diagnosis code only | cov_ever_all_stroke               |
| thrombophilia                  | GDPPR, HES APC                           | WLGP, PEDW                      | Binary indicator for thrombophilia prior to index date, defined using condition diagnosis code only                                                                  | cov_ever_thrombophilia            |
| thrombocytopenia, TTP          | GDPPR, HES APC                           | WLGP, PEDW                      | Binary indicator for thrombocytopenia prior to index date, defined using condition diagnosis code only                                                               | cov_ever_tcp                      |
| dementia                       | GDPPR, HES APC                           | WLGP, PEDW                      | Binary indicator for dementia prior to index date, defined using condition diagnosis code only                                                                       | cov_ever_dementia                 |
| liver disease                  | GDPPR, HES APC                           | WLGP, PEDW                      | Binary indicator for liver disease prior to index date, defined using condition diagnosis code only                                                                  | cov_ever_liver_disease            |
| chronic kidney disease         | GDPPR, HES APC                           | WLGP, PEDW                      | Binary indicator for chronic kidney disease prior to index date, defined using condition diagnosis code only                                                         | cov_ever_ckd                      |
| cancer                         | GDPPR, HES APC                           | WLGP, PEDW                      | Binary indicator for cancer prior to index date, defined using condition diagnosis code only                                                                         | cov_ever_cancer                   |
| hypertension                   | GDPPR, HES APC, primary care medications | WLGP, PEDW, WDDS                | Binary indicator for hypertension prior to index date, defined using either condition diagnosis code or drug use                                                     | cov_ever_hypertension             |
| diabetes                       | GDPPR, HES APC, primary care medications | WLGP, PEDW, WDDS                | Binary indicator for diabetes prior to index date, defined using either condition diagnosis code or drug use                                                         | cov_ever_diabetes                 |
| obesity                        | GDPPR, HES APC                           | WLGP, PEDW                      | Binary indicator for obesity prior to index date, defined using either condition diagnosis code code or measurement                                                  | cov_ever_obesity                  |
| depression                     | GDPPR, HES APC                           | WLGP, PEDW                      | Binary indicator for depression prior to index date, defined using condition diagnosis code only                                                                     | cov_ever_depression               |
| COPD                           | GDPPR, HES APC                           | WLGP, PEDW                      | Binary indicator for chronic obstructive pulmonary disease prior to index date, defined using condition diagnosis code only                                          | cov_ever_copd                     |
| number of unique disorders     | GDPPR                                    | WLGP                            | Number of consultations for different ailments/conditions/diseases in the year prior to index date                                                                   | cov_n_disorder                    |

| Variable                               | Data Sources (NHS England) | Data Sources (SAIL Databank) | Description                                                                                                                  | Variable name in analysis code   |
|----------------------------------------|----------------------------|------------------------------|------------------------------------------------------------------------------------------------------------------------------|----------------------------------|
| disseminated intravascular coagulation | GDPPR, HES APC             | WLGP, PEDW                   | Binary indicator for disseminated intravascular coagulation prior to index date, defined using condition diagnosis code only | cov_ever_other_arterial_embolism |
| mesenteric thrombus                    | GDPPR, HES APC             | WLGP, PEDW                   | Binary indicator for mesenteric thrombus prior to index date, defined using condition diagnosis code only                    | cov_ever_dic                     |
| artery dissection                      | GDPPR, HES APC             | WLGP, PEDW                   | Binary indicator for artery dissection prior to index date, defined using condition diagnosis code only                      | cov_ever_mesenteric_thrombus     |
| life threatening arrhythmias           | GDPPR, HES APC             | WLGP, PEDW                   | Binary indicator for life threatening arrhythmias prior to index date, defined using condition diagnosis code only           | cov_ever_artery_dissect          |
| cardiomyopathy                         | GDPPR, HES APC             | WLGP, PEDW                   | Binary indicator for cardiomyopathy prior to index date, defined using condition diagnosis code only                         | cov_ever_life_arrhythmia         |
| heart failure                          | GDPPR, HES APC             | WLGP, PEDW                   | Binary indicator for heart failure prior to index date, defined using condition diagnosis code only                          | cov_ever_cardiomyopathy          |
| pericarditis                           | GDPPR, HES APC             | WLGP, PEDW                   | Binary indicator for pericarditis prior to index date, defined using condition diagnosis code only                           | cov_ever_hf                      |
| myocarditis                            | GDPPR, HES APC             | WLGP, PEDW                   | Binary indicator for myocarditis prior to index date, defined using condition diagnosis code only                            | cov_ever_pericarditis            |
| major surgery in the last year         | HES APC                    | PEDW                         | Binary indicator for major surgery within a year prior to index date, defined using condition diagnosis code only            | cov_ever_myocarditis             |

Acronyms: GDPPR (General Practice Extraction Service (GPES) Data for Pandemic Planning and Research), HES (Hospital Episode Statistics), APC (Admitted Patient Care), AE (Accident and Emergency), WDS (Welsh Demographic Service Dataset), ADDE (Annual District Death Extract), ADDD (Annual District Death Daily), CDDS (COVID-19 Consolidated Deaths), CCDS (Critical Care Dataset), CVVD (Covid Vaccination Dataset), EDDS (Emergency Department Dataset), ICNC (Intensive Care National Audit and Research Centre - Covid19), MIDS (Maternity Indicators Dataset), NCCH (National Community Child Health), OPRD (Outpatient Referral), PEDW (Patient Episode Dataset for Wales), WASD (Welsh Ambulance Services NHS Trust), WLGP (Welsh Longitudinal GP Dataset - Welsh Primary Care), WDDS (Welsh Dispensing Dataset).

**Supplementary Table 5. Number of patients analysed in the Welsh SAIL Databank and the number of people (risk per 100,000 during follow up) who were and were not hospitalised within 28 days of diagnosis of COVID-19.**

| Characteristic                       | All       | Diagnosed with COVID-19            |                                     |
|--------------------------------------|-----------|------------------------------------|-------------------------------------|
|                                      |           | Hospitalised<br>N (per<br>100,000) | Non-hospitalised<br>N (per 100,000) |
| <b>All</b>                           | 2,615,854 | 7,106 (272)                        | 71,606 (2,737)                      |
| <b>Sex</b>                           |           |                                    |                                     |
| Male                                 | 1,297,835 | 3,778 (292)                        | 30,312 (2,336)                      |
| Female                               | 1,318,019 | 3,328 (253)                        | 41,294 (3,133)                      |
| <b>Age in decades</b>                |           |                                    |                                     |
| 18-29                                | 480,469   | 128 (26.6)                         | 18,090 (3765)                       |
| 30-39                                | 416,949   | 241 (57.8)                         | 13,063 (3133)                       |
| 40-49                                | 395,769   | 522 (132)                          | 12,904 (3261)                       |
| 50-59                                | 458,144   | 880 (192)                          | 13,312 (2906)                       |
| 60-69                                | 379,682   | 1,095 (288)                        | 6,081 (1602)                        |
| 70-79                                | 309,639   | 1,737 (561)                        | 3,690 (1192)                        |
| 80-89                                | 144,208   | 1,881 (1304)                       | 3,163 (2193)                        |
| 90+                                  | 30,994    | 622 (2007)                         | 1,303 (4204)                        |
| <b>Ethnicity</b>                     |           |                                    |                                     |
| Asian or Asian British               | 42,731    | 123 (288)                          | 1,689 (3953)                        |
| Black or Black British               | 11,921    | 22 (185)                           | 414 (3473)                          |
| Missing                              | 489,772   | 593 (121)                          | 11,479 (2344)                       |
| Mixed                                | 76,114    | 323 (424)                          | 2,475 (3252)                        |
| Other Ethnic Groups                  | 15,174    | 36 (237)                           | 435 (2867)                          |
| White                                | 1,980,142 | 6,009 (304)                        | 55,114 (2783)                       |
| <b>Index of Multiple Deprivation</b> |           |                                    |                                     |
| 1 (most deprived)                    | 494,007   | 1,120 (227)                        | 12,459 (2522)                       |
| 2                                    | 489,758   | 1,098 (224)                        | 10,886 (2223)                       |
| 3                                    | 492,736   | 1,158 (235)                        | 11,788 (2392)                       |
| 4                                    | 485,216   | 1,562 (322)                        | 15,680 (3232)                       |
| 5 (least deprived)                   | 478,180   | 1,758 (368)                        | 15,999 (3346)                       |
| Missing                              | 175,957   | 410 (233)                          | 4,794 (2725)                        |
| <b>Smoking status</b>                |           |                                    |                                     |
| Current                              | 560,828   | 1,087 (194)                        | 12,399 (2211)                       |
| Former                               | 160,367   | 903 (563)                          | 3,869 (2413)                        |
| Missing                              | 512,977   | 1,121 (219)                        | 10,795 (2104)                       |
| Never                                | 1,381,682 | 3,995 (289)                        | 44,543 (3224)                       |
| <b>Medical history</b>               |           |                                    |                                     |
| Arterial thrombosis                  | 120,085   | 1,536 (1,279)                      | 2,937 (2446)                        |
| Venous thromboembolism               | 38,072    | 449 (1179)                         | 1,033 (2713)                        |
| <b>Number of medications</b>         |           |                                    |                                     |
| 0                                    | 1,079,900 | 730 (67.6)                         | 28,924 (2678)                       |
| 1-5                                  | 1,367,052 | 4,060 (297)                        | 37,944 (2,776)                      |
| 6+                                   | 168,902   | 2,316 (1371)                       | 4,738 (2805)                        |
| <b>Number of diagnoses</b>           |           |                                    |                                     |
| 0                                    | 2,219,689 | 3,969 (179)                        | 61,083 (2,752)                      |
| 1-5                                  | 248,262   | 2,091 (842)                        | 6,974 (2,809)                       |
| 6+                                   | 147,903   | 1,046 (707)                        | 3,549 (2,400)                       |



**Supplementary Table 6. Hazard ratios (95% CI) compared with no COVID-19 for first arterial thrombosis and first venous thromboembolism, according to time since diagnosis of COVID-19. All results are maximally adjusted.**

|                                              | Weeks since COVID-19 diagnosis |                  |                  |                  |                  |                  |                  |
|----------------------------------------------|--------------------------------|------------------|------------------|------------------|------------------|------------------|------------------|
|                                              | 1                              | 2                | 3-4              | 5-8              | 9-12             | 13-26            | 27-49            |
| <b>Arterial thrombosis</b>                   |                                |                  |                  |                  |                  |                  |                  |
| Critical care within 28 days of diagnosis    | -                              | -                | -                | 9.09 (7.19-11.5) | 4.91 (3.43-7.04) | 2.30 (1.70-3.09) | 1.79 (1.14-2.81) |
| No critical care within 28 days of diagnosis | -                              | -                | -                | 2.71 (2.37-3.09) | 1.71 (1.42-2.07) | 1.44 (1.29-1.62) | 1.43 (1.22-1.67) |
| Fatal event                                  | 18.6 (17.3-20.2)               | 6.26 (5.43-7.22) | 3.95 (3.44-4.54) | 2.32 (2.00-2.70) | 1.87 (1.54-2.26) | 1.82 (1.62-2.05) | 1.40 (1.13-1.75) |
| Non-fatal event                              | 20.0 (19.2-20.7)               | 3.11 (2.81-3.43) | 2.44 (2.24-2.66) | 1.85 (1.71-2.00) | 1.50 (1.35-1.66) | 1.19 (1.11-1.28) | 1.29 (1.15-1.45) |
| <b>Venous thromboembolism</b>                |                                |                  |                  |                  |                  |                  |                  |
| Critical care within 28 days of diagnosis    | -                              | -                | -                | 31.4 (24.2-40.8) | 11.0 (6.73-18.0) | 3.52 (2.18-5.67) | 1.10 (0.36-3.42) |
| No critical care within 28 days of diagnosis | -                              | -                | -                | 8.78 (7.41-10.4) | 4.54 (3.51-5.89) | 2.56 (2.11-3.11) | 1.54 (1.09-2.17) |
| Fatal event                                  | 21.1 (17.3-25.7)               | 6.64 (4.60-9.58) | 5.00 (3.61-6.93) | 2.68 (1.85-3.87) | 2.42 (1.54-3.82) | 2.05 (1.52-2.77) | 0.72 (0.32-1.61) |
| Non-fatal event                              | 22.5 (20.9-24.2)               | 6.78 (5.90-7.78) | 7.78 (7.07-8.56) | 4.39 (3.95-4.87) | 2.91 (2.50-3.40) | 2.13 (1.91-2.38) | 1.82 (1.48-2.23) |

**Supplementary Figure 1. Maximally adjusted hazard ratios (log scale) for different arterial thrombotic, and venous thromboembolic and other vascular events by time since diagnosis of COVID-19, separately for hospitalised and non-hospitalised COVID-19.**

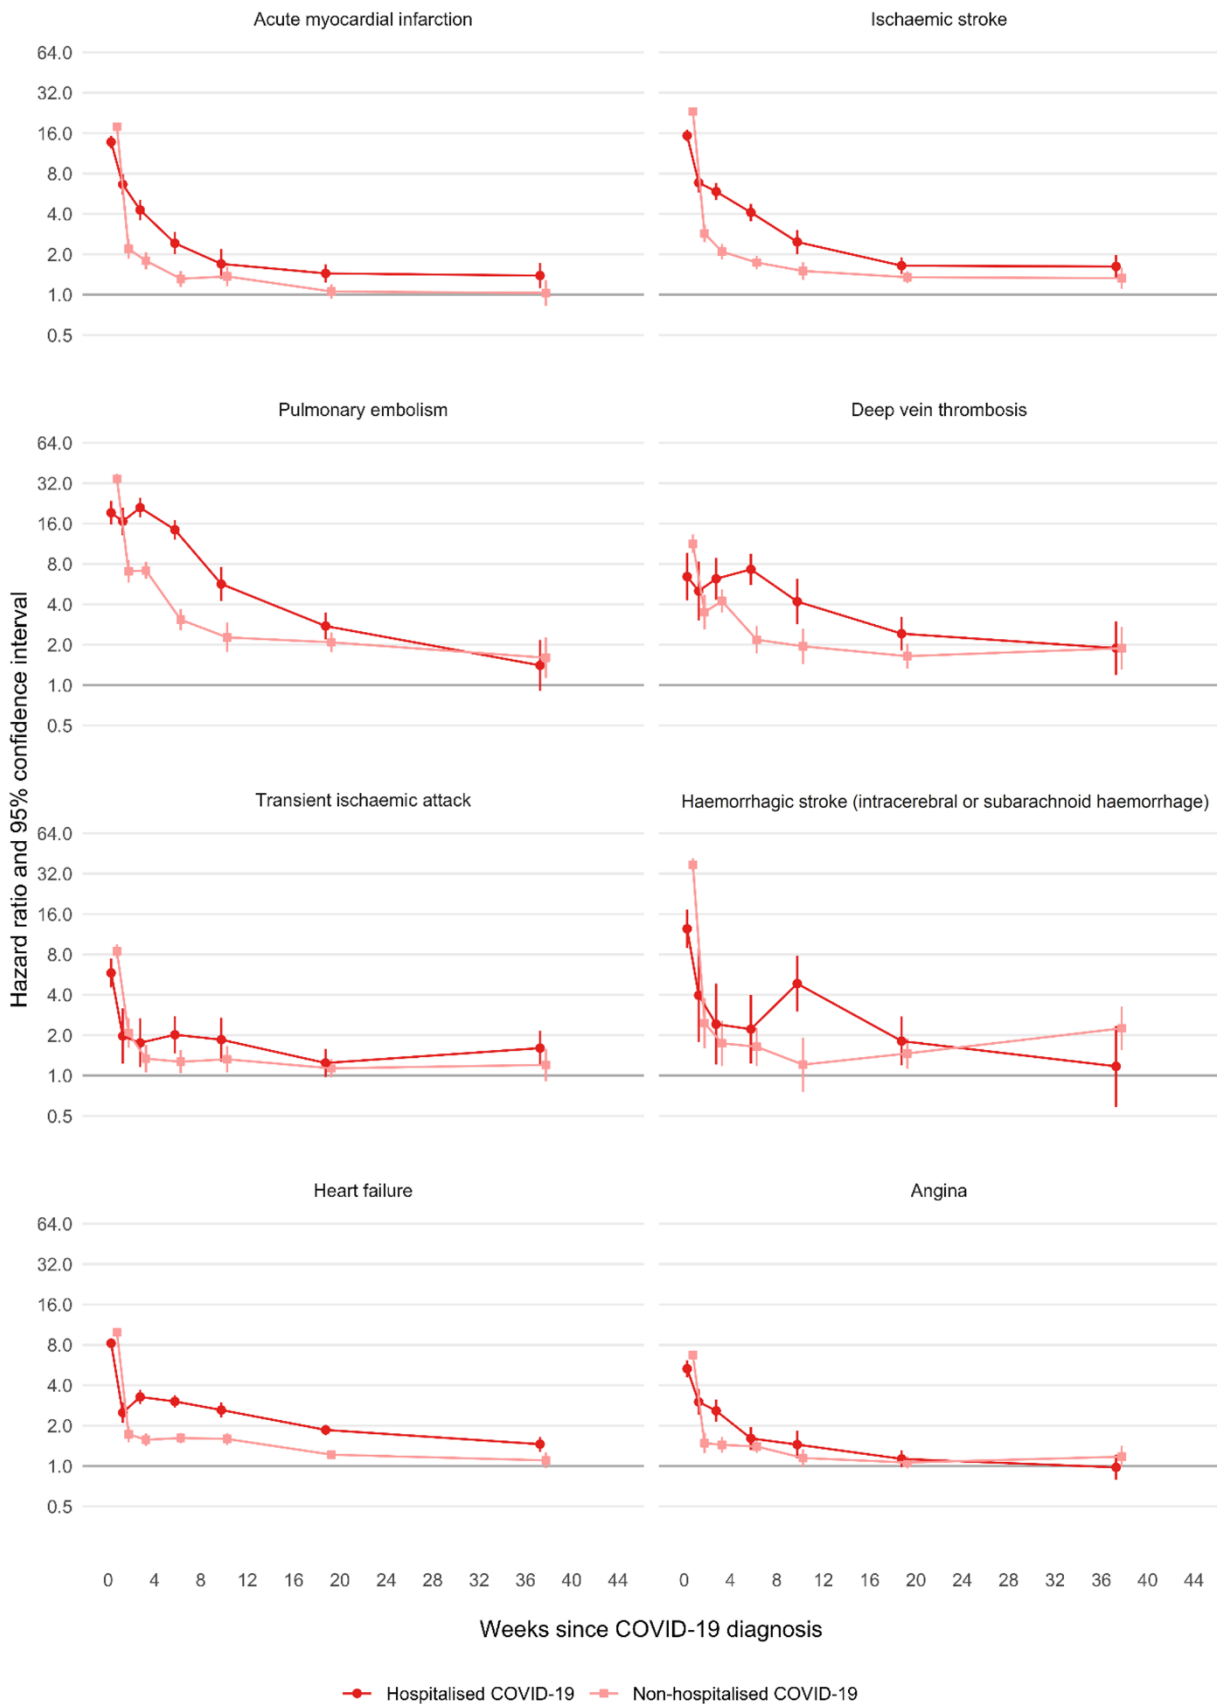

**Supplementary Figure 2. Maximally adjusted hazard ratios (log scale) for first arterial thrombosis and first venous thromboembolism by time since diagnosis of COVID-19, separately for those who received critical care for COVID-19 within 28 days of diagnosis and those who did not receive critical care for COVID-19 within 28 days of diagnosis.**

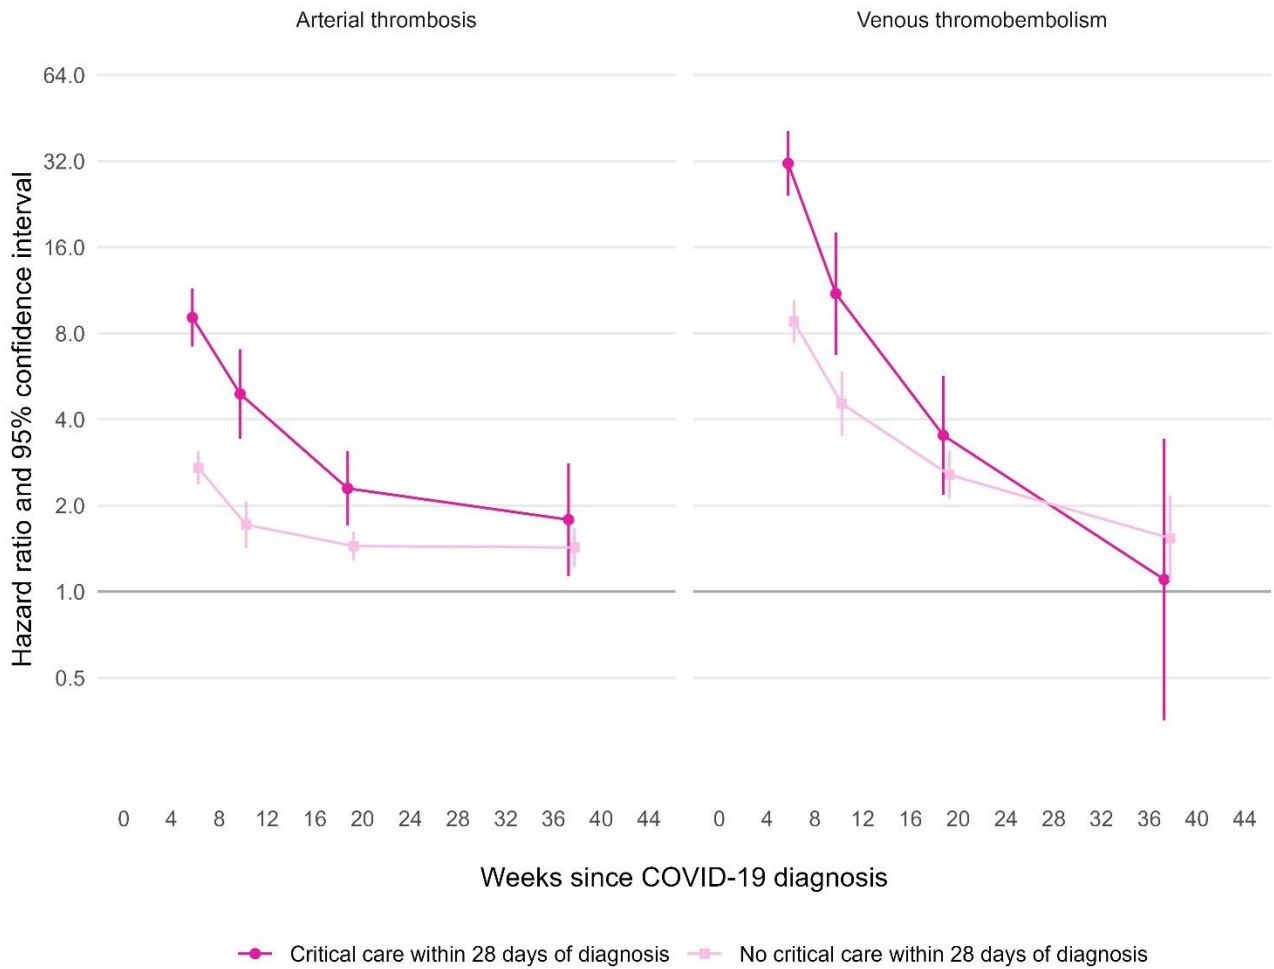

**Supplementary Figure 3. Maximally adjusted hazard ratios (log scale) for first arterial thrombosis and first venous thromboembolism different by time since diagnosis of COVID-19, separately for fatal and non-fatal events.**

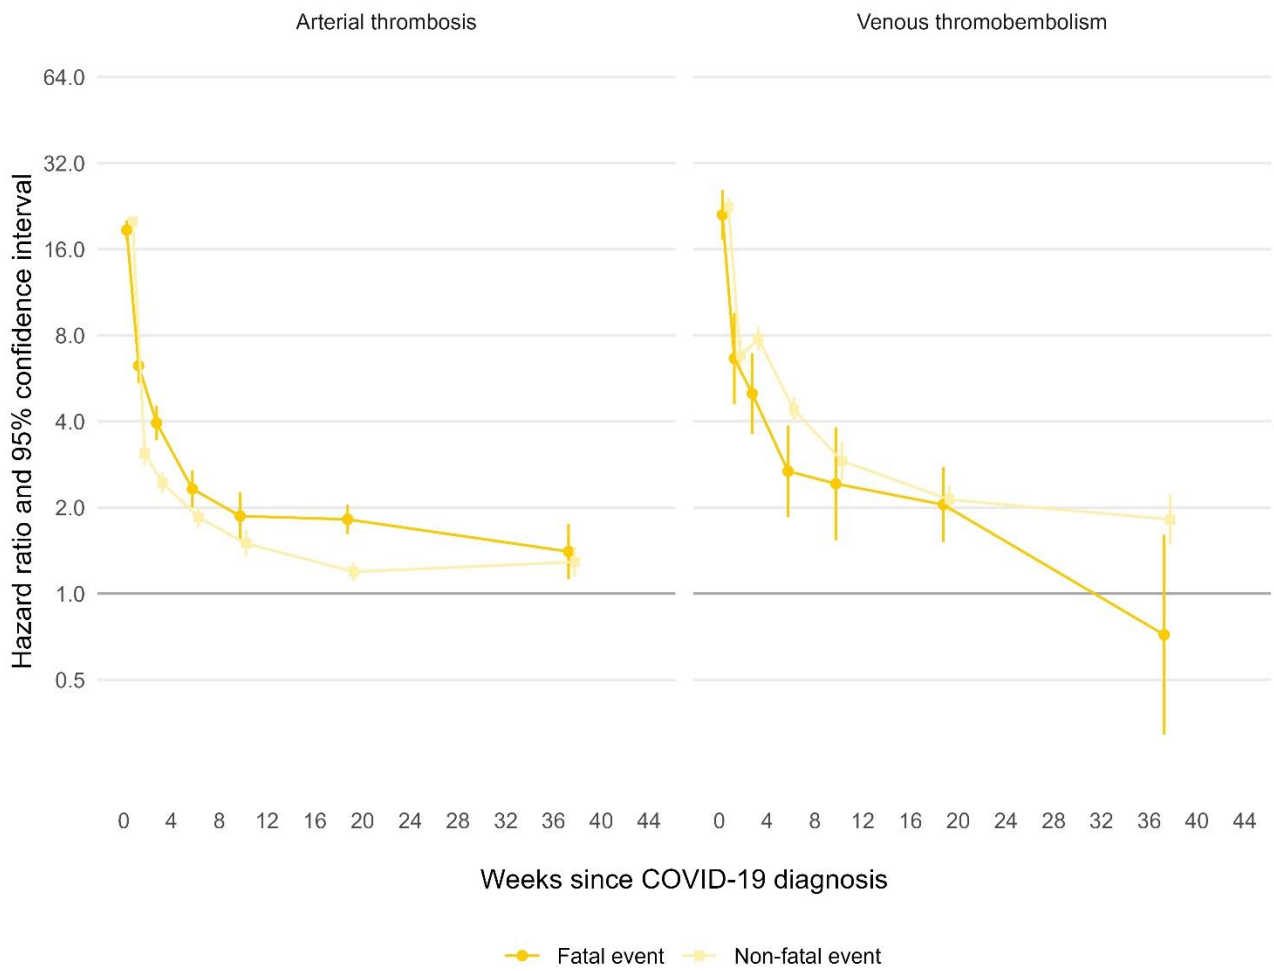

**Supplementary Figure 4. Estimated absolute increase in risk of arterial thromboses and venous thromboembolisms over time since diagnosis of COVID-19, compared with no COVID-19 diagnosis, after excluding the risk during the first 28 days since diagnosis**

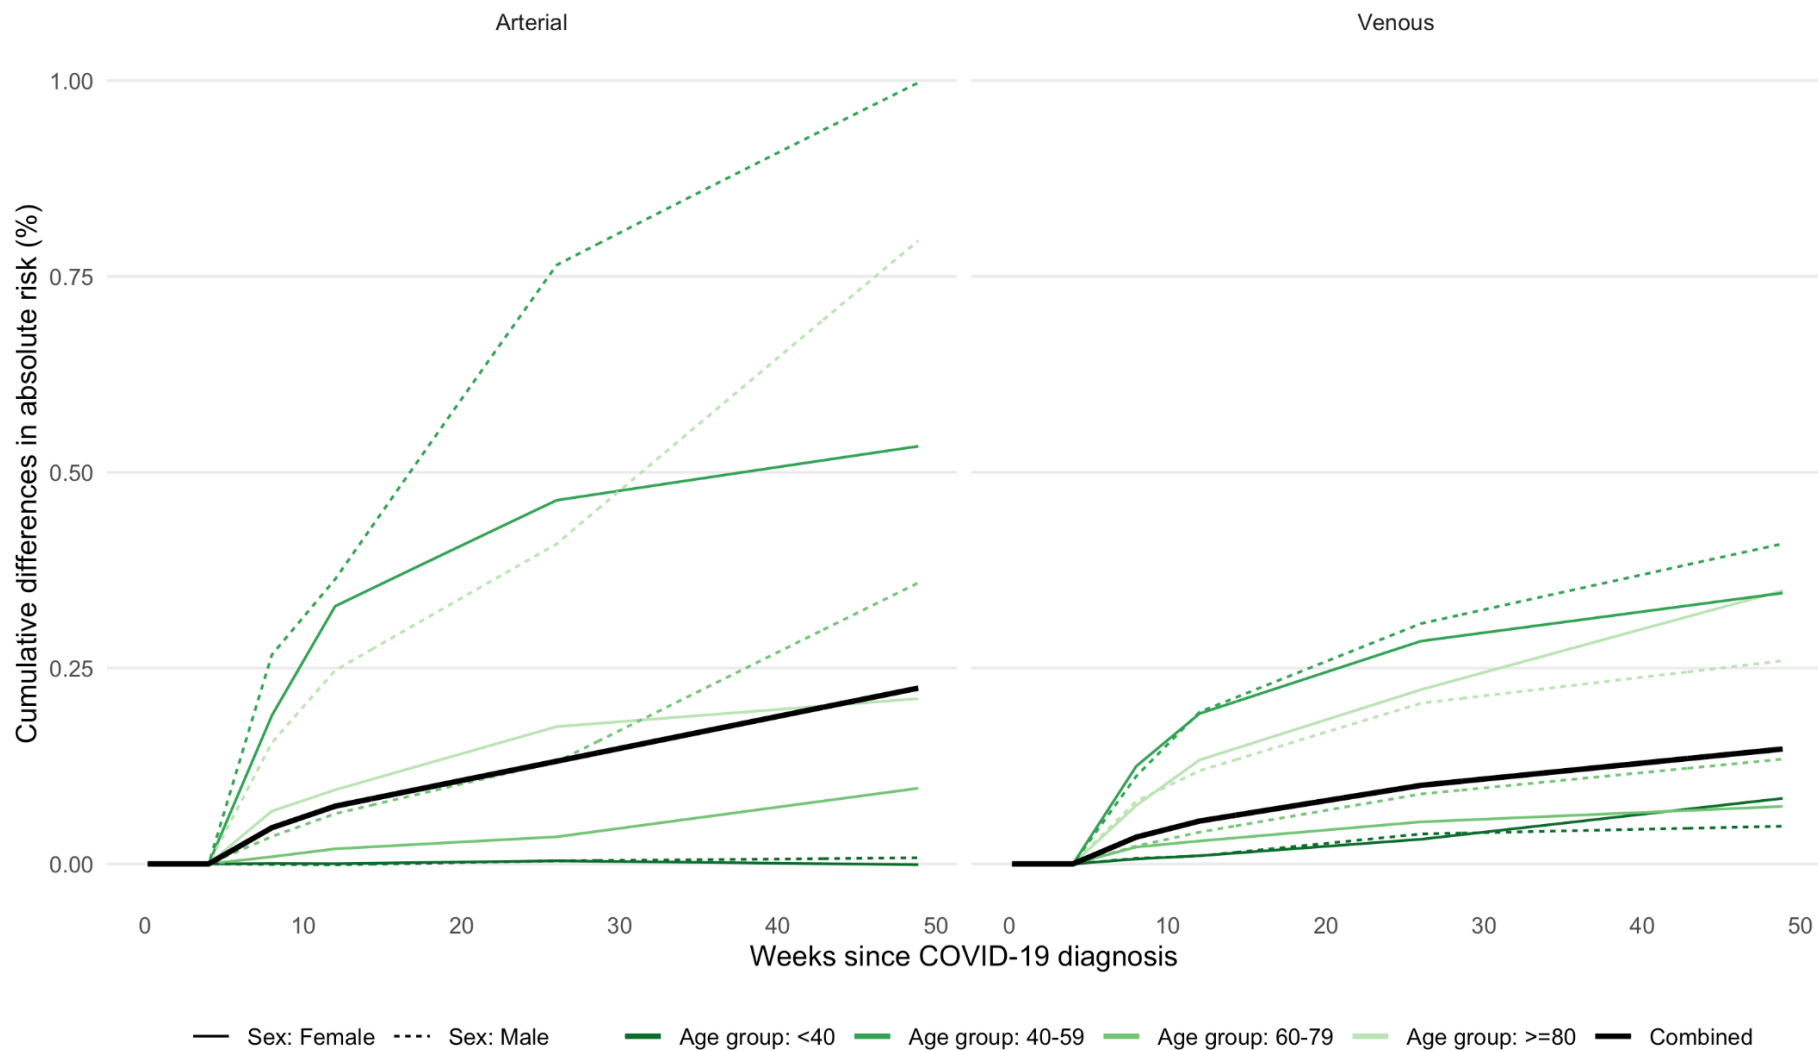

**Supplementary Figure 5. Estimated absolute increase in risk of arterial thromboses and venous thromboembolisms over time since diagnosis of COVID-19, compared with no COVID-19 diagnosis, stratified by those with hospitalised COVID-19 and non-hospitalised COVID-19.**

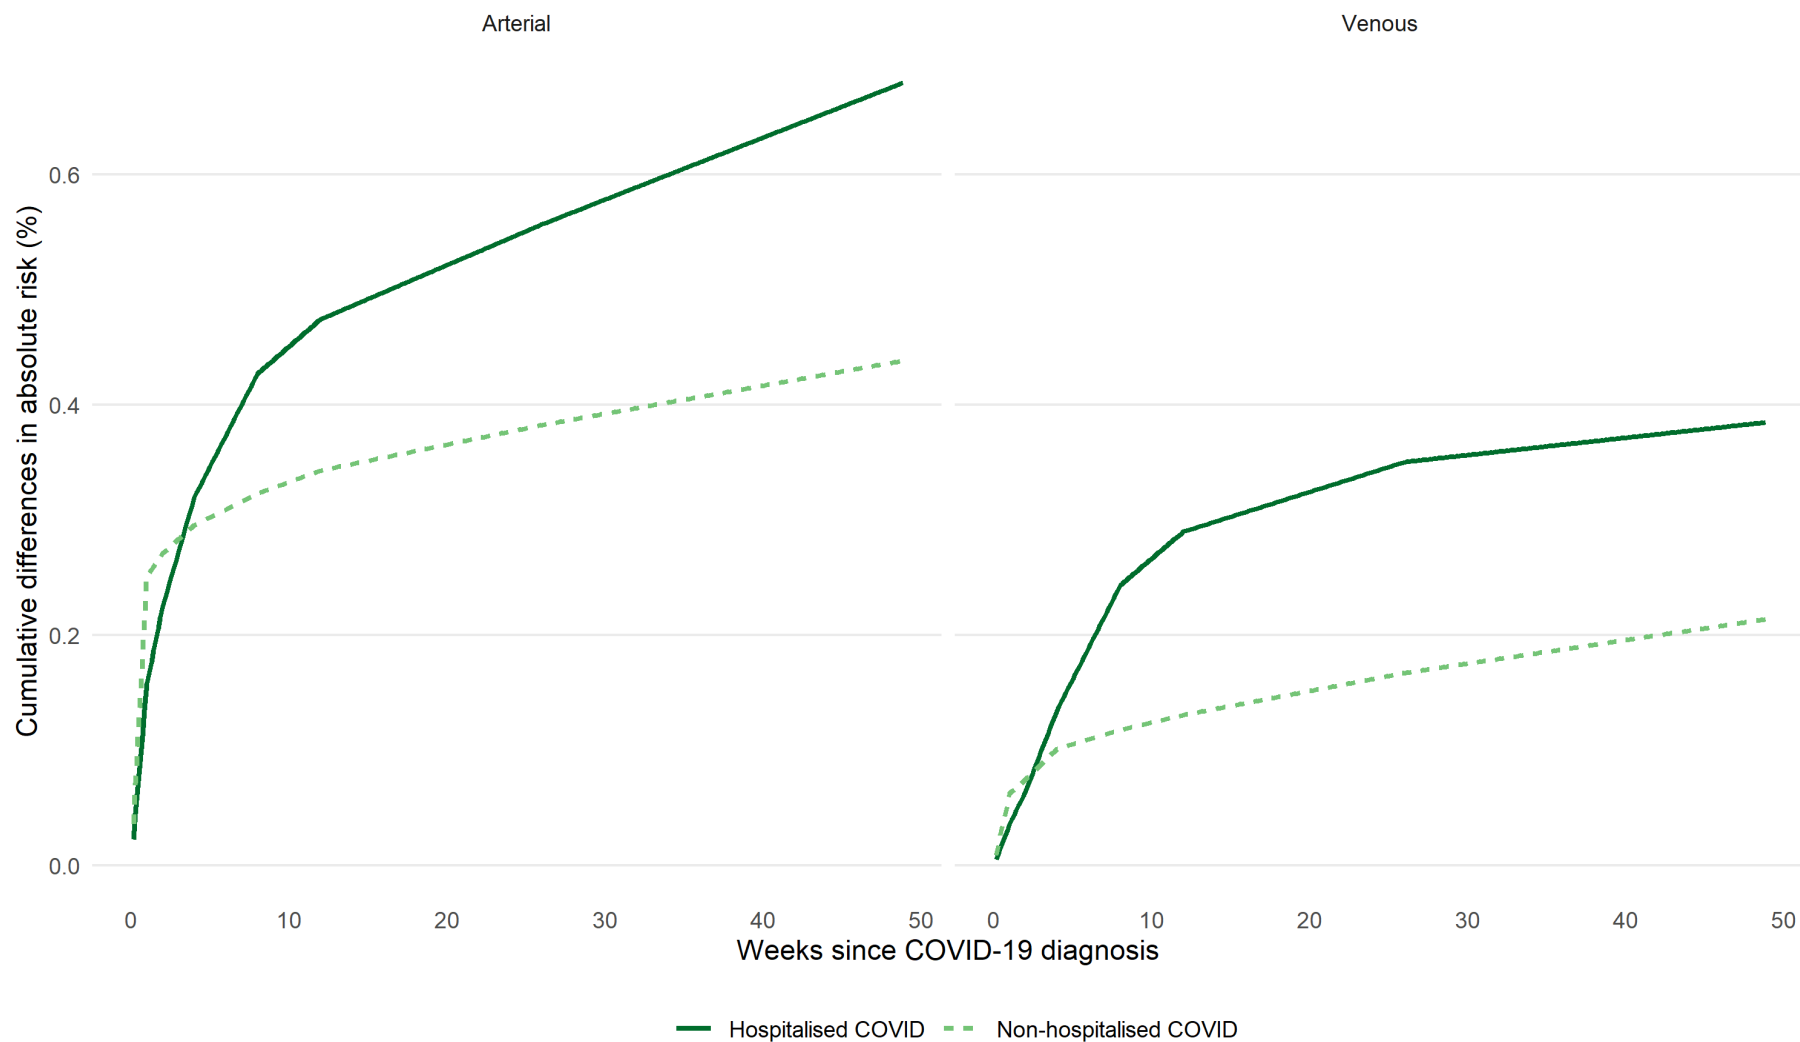

Supplement: cir-146-892-s001.pdf [file cir-146-892-s001.pdf]
